# Supplementary material for: COVID-19 Immunisation, Willingness to Be Vaccinated and Vaccination Strategies to Improve Vaccine Uptake in Australia
Source: Vaccines (Basel). 2021 Dec 11;9(12):1467. doi: 10.3390/vaccines9121467 (PMC8704895; doi:10.3390/vaccines9121467)
Supplement: Supplementary file 1 [file vaccines-09-01467-s001.zip › vaccines-1458846-supplementary.pdf]

## Supplementary data

Socio-Economic Index For Areas (SEIFA) quintiles were presented according to the definition from the Australian Bureau of Statistics using the respondent's postcode and suburb. The respondent's country of birth/Culturally and Linguistically Diversity was divided into two broad categories: English speaking countries and non-English speaking countries. Respondents who were born in Australia, the United Kingdom, Ireland, the United States of America, New Zealand, Canada, and South Africa are included in the English-speaking background category. All other respondents were included in the non-English speaking background category. Health outcomes presented in the analyses were self-reported according to whether the respondent had even been told by a doctor or nurse they had a chronic medical condition. Aboriginal was used in this document respectfully as an all-encompassing term for Aboriginal and Torres Strait Islander people, health, and culture.

Table S1: Survey questions

| Questions                                                                                                                                                                                                                                                                                              | Responses                                                                                                                                                                                                                                                                                                  |
|--------------------------------------------------------------------------------------------------------------------------------------------------------------------------------------------------------------------------------------------------------------------------------------------------------|------------------------------------------------------------------------------------------------------------------------------------------------------------------------------------------------------------------------------------------------------------------------------------------------------------|
| <b>The next few questions are about the COVID-19 vaccine. Since March, South Australia has been rolling out the vaccine starting with those who are most vulnerable to the effects of COVID-19 or who have the highest risk of being exposed to, or spreading the virus.</b>                           |                                                                                                                                                                                                                                                                                                            |
| <b>1. Which of the following statements about the COVID-19 vaccine best apply to you?</b><br>(Single response)                                                                                                                                                                                         | 1. I will be getting vaccinated when it becomes available to me<br>2. I will not be getting vaccinated it becomes available to me<br>3. I am undecided whether or not I will be getting vaccinated when it becomes available to me<br>4. I have been vaccinated (one or two doses)<br>5. Prefer not to say |
| <b>2. Do you think COVID-19 vaccination or proof of vaccination should be required for:</b><br>(Select all that apply)                                                                                                                                                                                 | 1. International travelling<br>2. Domestic travelling<br>3. Should not be required<br>4. Don't know<br>5. Prefer not to say                                                                                                                                                                                |
| <b>3. If you are a parent or caregiver of a child/children aged less than 16 years, please answer this question. If the COVID-19 vaccine is safe, effective and approved to use in children by the government, how likely would you be to get your child/children vaccinated?</b><br>(Single response) | 1. Very likely<br>2. Somewhat likely<br>3. Not very likely<br>4. Not at all likely<br>5. Don't know<br>6. Prefer not to say<br>7. Not a parent or care-giver of a child <16 years                                                                                                                          |
| <b>How much do you agree or disagree with the following statements:</b>                                                                                                                                                                                                                                |                                                                                                                                                                                                                                                                                                            |
| <b>4. COVID-19 vaccination should be made mandatory by the Government.</b>                                                                                                                                                                                                                             | 1. Strongly Agree<br>2. Somewhat agree<br>3. Neither agree or disagree<br>4. Somewhat disagree<br>5. Strongly disagree<br>6. Don't know<br>7. Prefer not to say                                                                                                                                            |
| <b>5. Tailored vaccine reminder message/letter should be sent to everyone.</b><br>(Single response)                                                                                                                                                                                                    | 1. Strongly Agree<br>2. Somewhat agree<br>3. Neither agree or disagree<br>4. Somewhat disagree<br>5. Strongly disagree                                                                                                                                                                                     |

|                                                                                                                                                                                      |                              |
|--------------------------------------------------------------------------------------------------------------------------------------------------------------------------------------|------------------------------|
|                                                                                                                                                                                      | 6. Don't know                |
|                                                                                                                                                                                      | 7. Prefer not to say         |
| <b>6. COVID-19 vaccination or proof of vaccination should be required for visiting Residential Aged Care Homes and working in a hospital or healthcare clinic. (Single response)</b> | 1. Strongly Agree            |
|                                                                                                                                                                                      | 2. Somewhat agree            |
|                                                                                                                                                                                      | 3. Neither agree or disagree |
|                                                                                                                                                                                      | 4. Somewhat disagree         |
|                                                                                                                                                                                      | 5. Strongly disagree         |
|                                                                                                                                                                                      | 6. Don't know                |
|                                                                                                                                                                                      | 7. Prefer not to say         |

Table S2: Weighted and adjusted odds ratios of parental willingness to get their child/children vaccinated

| Parental vaccine willingness                        | aOdds Ratio | 95%CI      |
|-----------------------------------------------------|-------------|------------|
| Age                                                 | 1.00        | 0.99-1.02  |
| <b>SEIFA</b>                                        |             |            |
| lowest quintile                                     | Ref         |            |
| low quintile                                        | 0.85        | 0.47-1.53  |
| middle quintile                                     | 0.71        | 0.40-1.28  |
| high quintile                                       | 0.86        | 0.47-1.58  |
| highest quintile                                    | 1.05        | 0.57-1.96  |
| <b>Education level</b>                              |             |            |
| Lower than Year 12 education                        | Ref         |            |
| ≥Y12/TAFE/certificate/diploma                       | 0.91        | 0.51-1.62  |
| Degree or higher                                    | 0.87        | 0.48-1.58  |
| <b>Chronic medical conditions</b>                   |             |            |
| No                                                  | Ref         |            |
| Yes                                                 | 1.15        | 0.78-1.70  |
| <b>Willingness of taking vaccination themselves</b> |             |            |
| Will not get vaccinated/undecided                   | Ref         |            |
| Will get vaccinated/have already been vaccinated    | 14.10       | 9.15-21.71 |

Table S3: Weighted and adjusted odds ratios of agreeing that COVID vaccination should be required for international travelling

| International travelling | aOdds Ratio | 95%CI     |
|--------------------------|-------------|-----------|
| <b>Age group</b>         |             |           |
| 18-29yrs                 | Ref         |           |
| 30-49yrs                 | 0.83        | 0.58-1.19 |
| 50-69yrs                 | 1.16        | 0.79-1.70 |
| ≥70yrs                   | 2.47        | 1.48-4.12 |
| <b>Gender</b>            |             |           |
| Male                     | Ref         |           |
| Female                   | 1.25        | 0.97-1.60 |
| <b>SEIFA</b>             |             |           |
| lowest quintile          | Ref         |           |

| <b>International travelling</b>   | <b>aOdds Ratio</b> | <b>95%CI</b> |
|-----------------------------------|--------------------|--------------|
| low quintile                      | 1.23               | 0.84-1.78    |
| middle quintile                   | 1.70               | 1.16-2.48    |
| high quintile                     | 1.31               | 0.89-1.93    |
| highest quintile                  | 1.74               | 1.15-2.61    |
| <b>Marital status</b>             |                    |              |
| Married/Living with partner       | Ref                |              |
| Single                            | 0.78               | 0.60-1.02    |
| <b>Employment</b>                 |                    |              |
| Unemployed                        | Ref                |              |
| Employed                          | 1.43               | 0.92-2.22    |
| Others                            | 1.46               | 0.90-2.37    |
| <b>Area of residence</b>          |                    |              |
| Metro. Adelaide                   | Ref                |              |
| SA Country                        | 1.30               | 0.96-1.76    |
| <b>Chronic medical conditions</b> |                    |              |
| No                                | Ref                |              |
| Yes                               | 1.09               | 0.83-1.44    |

Table S4: Weighted and adjusted odds ratios of agreeing that COVID vaccination should be required for domestic travelling

| <b>Domestic travelling</b>        | <b>aOdds Ratio</b> | <b>95%CI</b> |
|-----------------------------------|--------------------|--------------|
| <b>Age group</b>                  |                    |              |
| 18-29yrs                          | Ref                |              |
| 30-49yrs                          | 0.98               | 0.76-1.27    |
| 50-69yrs                          | 1.53               | 1.18-1.99    |
| ≥70yrs                            | 2.37               | 1.69-3.32    |
| <b>Gender</b>                     |                    |              |
| Male                              | Ref                |              |
| Female                            | 1.02               | 0.86-1.22    |
| <b>Education level</b>            |                    |              |
| Lower than Year 12 education      | Ref                |              |
| ≥Y12/TAFE/certificate/diploma     | 1.05               | 0.83-1.32    |
| Degree or higher                  | 1.23               | 0.96-1.59    |
| <b>Employment</b>                 |                    |              |
| Unemployed                        | Ref                |              |
| Employed                          | 0.75               | 0.52-1.09    |
| Others                            | 1.07               | 0.72-1.61    |
| <b>Chronic medical conditions</b> |                    |              |
| No                                | Ref                |              |
| Yes                               | 1.25               | 1.03-1.52    |

Table S5: Adjusted odds ratios of strongly agreeing that COVID-19 vaccination should be made mandatory by the Government

| <b>Mandatory vaccination</b>         | <b>aOdds Ratio</b> | <b>95%CI</b> |
|--------------------------------------|--------------------|--------------|
| <b>Age</b>                           |                    |              |
| 18-29yrs                             | Ref                |              |
| 30-49yrs                             | 1.18               | 0.86-1.60    |
| 50-69yrs                             | 1.44               | 1.06-1.97    |
| ≥70yrs                               | 2.48               | 1.72-3.55    |
| <b>Gender</b>                        |                    |              |
| Male                                 | Ref                |              |
| Female                               | 0.73               | 0.61-0.88    |
| <b>Aboriginal status</b>             |                    |              |
| No                                   |                    |              |
| Yes                                  |                    |              |
| <b>SEIFA</b>                         |                    |              |
| lowest quintile                      | Ref                |              |
| low quintile                         | 0.72               | 0.53-0.96    |
| middle quintile                      | 0.88               | 0.65-1.19    |
| high quintile                        | 0.75               | 0.55-1.03    |
| highest quintile                     | 0.82               | 0.60-1.13    |
| <b>Marital status</b>                |                    |              |
| Married/de facto                     |                    |              |
| Single                               |                    |              |
| <b>Education level</b>               |                    |              |
| Lower than Year 12 education         | Ref                |              |
| ≥Year 12/ TAFE/ certificate/ diploma | 0.98               | 0.78-1.23    |
| Degree or higher                     | 0.83               | 0.64-1.08    |
| <b>Employment</b>                    |                    |              |
| Unemployed                           | Ref                |              |
| Employed^                            | 0.68               | 0.46-1.01    |
| Others^^                             | 1.12               | 0.73-1.71    |
| <b>COB (Country of Birth)</b>        |                    |              |
| COB English main language            | Ref                |              |
| COB Non English speaking             | 1.36               | 1.04-1.77    |
| <b>Area of residence</b>             |                    |              |
| Metro. Adelaide                      | Ref                |              |
| SA Country                           | 1.14               | 0.92-1.42    |
| <b>Chronic medical conditions</b>    |                    |              |
| No                                   | Ref                |              |
| Yes                                  | 0.89               | 0.72-1.10    |

Table S6: Adjusted odds ratios of strongly agreeing that tailored vaccine reminders should be sent to everyone

| <b>Tailored vaccine reminders</b> | <b>aOdds Ratio</b> | <b>95%CI</b> |
|-----------------------------------|--------------------|--------------|
| <b>Age group</b>                  |                    |              |
| 18-29yrs                          | Ref                |              |
| 30-49yrs                          | 1.34               | 1.02-1.76    |

| <b>Tailored vaccine reminders</b> | <b>aOdds Ratio</b> | <b>95%CI</b> |
|-----------------------------------|--------------------|--------------|
| 50-69yrs                          | 1.17               | 0.90-1.53    |
| ≥70yrs                            | 1.34               | 0.98-1.84    |
| <b>Marital status</b>             |                    |              |
| Married/Living with partner       | Ref                |              |
| Single                            | 0.89               | 0.75-1.07    |
| <b>Education level</b>            |                    |              |
| Lower than Year 12 education      | Ref                |              |
| ≥Y12/TAFE/certificate/diploma     | 1.05               | 0.85-1.30    |
| Degree or higher                  | 1.20               | 0.95-1.51    |
| <b>Employment</b>                 |                    |              |
| Unemployed                        | Ref                |              |
| Employed                          | 0.87               | 0.61-1.26    |
| Others                            | 1.15               | 0.78-1.69    |
| <b>COB (Country of Birth)</b>     |                    |              |
| COB English main language         | Ref                |              |
| COB Non English speaking          | 1.24               | 0.98-1.58    |

Table S7: Adjusted odds ratios of strongly agreeing that COVID-19 vaccination should be required for visiting Residential Aged Care Homes and working in healthcare settings

| <b>Vaccination requirements for visiting Residential Aged Care Homes and working in healthcare settings</b> | <b>aOdds Ratio</b> | <b>95%CI</b> |
|-------------------------------------------------------------------------------------------------------------|--------------------|--------------|
| <b>Age group</b>                                                                                            |                    |              |
| 18-29yrs                                                                                                    | Ref                |              |
| 30-49yrs                                                                                                    | 0.98               | 0.74-1.30    |
| 50-69yrs                                                                                                    | 1.10               | 0.83-1.46    |
| ≥70yrs                                                                                                      | 1.74               | 1.22-2.49    |
| <b>Aboriginal status</b>                                                                                    |                    |              |
| No                                                                                                          | Ref                |              |
| Yes                                                                                                         | 0.68               | 0.35-1.30    |
| <b>SEIFA</b>                                                                                                |                    |              |
| lowest quintile                                                                                             | Ref                |              |
| low quintile                                                                                                | 0.96               | 0.71-1.30    |
| middle quintile                                                                                             | 1.06               | 0.78-1.45    |
| high quintile                                                                                               | 0.90               | 0.65-1.23    |
| highest quintile                                                                                            | 1.40               | 1.02-1.92    |
| <b>Marital status</b>                                                                                       | Ref                |              |
| Married/Living with partner                                                                                 |                    |              |
| Single                                                                                                      | 0.85               | 0.70-1.04    |
| <b>Education level</b>                                                                                      |                    |              |
| Lower than Year 12 education                                                                                | Ref                |              |
| ≥Y12/TAFE/certificate/diploma                                                                               | 0.86               | 0.67-1.10    |
| Degree or higher                                                                                            | 1.00               | 0.76-1.33    |
| <b>Employment</b>                                                                                           |                    |              |
| Unemployed                                                                                                  | Ref                |              |

| <b>Vaccination requirements for visiting<br/>Residential Aged Care Homes and working<br/>in healthcare settings</b> | <b>aOdds Ratio</b> | <b>95%CI</b> |
|---------------------------------------------------------------------------------------------------------------------|--------------------|--------------|
| Employed                                                                                                            | 0.98               | 0.66-1.44    |
| Others                                                                                                              | 1.48               | 0.98-2.26    |
